# Supplementary material for: Factors Influencing Properties of Spider Silk Coatings and Their Interactions within a Biological Environment
Source: MDPI journal article supplement (doi:10.3390/jfb14080434), 2023-08-19
Supplement: s1 [file s1]

# Factors Influencing Properties of Spider Silk Coatings and Their Interactions within a Biological Environment

Vanessa T. Trossmann <sup>1</sup>, Sarah Lentz <sup>1</sup> and Thomas Scheibel <sup>1,2,3,4,5,6,\*</sup>

<sup>1</sup> Chair of Biomaterials, Faculty of Engineering Science, University of Bayreuth, Prof.-Rüdiger-Bormann-Straße 1, 95447 Bayreuth, Germany; vanessa.trossmann@uni-bayreuth.de (V.T.T.); sarah1.lentz@uni-bayreuth.de (S.L.)

<sup>2</sup> Bayreuth Center for Colloids and Interfaces (BZKG), University of Bayreuth, Universitätsstraße 30, 95440 Bayreuth, Germany

<sup>3</sup> Bavarian Polymer Institute (BPI), University of Bayreuth, Universitätsstraße 30, 95440 Bayreuth, Germany

<sup>4</sup> Bayreuth Center for molecular Biosciences (BZMB), University of Bayreuth, Universitätsstraße 30, 95440 Bayreuth, Germany

<sup>5</sup> Bayreuth Materials Center (BayMAT), University of Bayreuth, Universitätsstraße 30, 95440 Bayreuth, Germany

<sup>6</sup> Faculty of Medicine, University of Würzburg, Pleicherwall 2, 97070 Würzburg, Germany

\* Correspondence: thomas.scheibel@uni-bayreuth.de

**Table S1.** Summary of recombinant spider silk proteins, spider species, production host and respective amino acid sequence.

| Protein                                | Spider species    | Production host | Amino acid sequence                                                                                                                           | Reference |
|----------------------------------------|-------------------|-----------------|-----------------------------------------------------------------------------------------------------------------------------------------------|-----------|
| eADF4(C16)                             | <i>Araneus</i>    | <i>E. coli</i>  | C- module repeated 16 or 32 times                                                                                                             | [1-7]     |
|                                        | <i>diadematus</i> |                 | GSSAAAAAAAAASGPGGYGPENQGPSGPGGYGPGGP                                                                                                          |           |
| eADF4(C32)                             |                   |                 | + cell adhesion peptides (e.g. RGD, IKVAV)<br>+ biomineralization peptides<br>+ cystein-containing peptide (e.g. ntagCys)                     |           |
| eADF4(κ16)                             | <i>Araneus</i>    | <i>E. coli</i>  | κ-module repeated 16 times                                                                                                                    | [1,3-6]   |
|                                        | <i>diadematus</i> |                 | GSSAAAAAAAAASGPGGYGPKNQGPSGPGGYGPGGP                                                                                                          |           |
|                                        |                   |                 | + cell adhesion peptides (e.g. RGD, IKVAV)<br>+ cystein-containing peptide (e.g. ntagCys)                                                     |           |
| eADF4(Ω16)                             | <i>Araneus</i>    | <i>E. coli</i>  | Ω-module repeated 16 times                                                                                                                    | [1-4]     |
|                                        | <i>diadematus</i> |                 | GSSAAAAAAAAASGPGGYGPQNQGPSGPGGYGPGGP                                                                                                          |           |
|                                        |                   |                 | + cell adhesion peptides (e.g. RGD, IKVAV)                                                                                                    |           |
| eADF3(AQ) <sub>12</sub>                | <i>Araneus</i>    | <i>E. coli</i>  | A and Q module repeated 12 or 24 times                                                                                                        | [1,2]     |
|                                        | <i>diadematus</i> |                 | (A) GPYGP GASAAAAAGGYGPGSGQQ                                                                                                                  |           |
| eADF3(AQ) <sub>24</sub>                |                   |                 | (Q) GPGQQGPGQQGPGQQGPGQQ                                                                                                                      |           |
| eADF3<br>with function-<br>nal domains |                   |                 | Domains: cellulose-binding domains (CBM), peptide interacting domains (SPY_C), gamma-crystalline D domain (Crys), fibronectin III domain (FN) | [8-10]    |

|        |                                |                         |                                                                                                                                                                                                                                                                                                                                                                                                                                                                                                                                                                                                                                                                                                                                                                                                                                                                                                                                                             |
|--------|--------------------------------|-------------------------|-------------------------------------------------------------------------------------------------------------------------------------------------------------------------------------------------------------------------------------------------------------------------------------------------------------------------------------------------------------------------------------------------------------------------------------------------------------------------------------------------------------------------------------------------------------------------------------------------------------------------------------------------------------------------------------------------------------------------------------------------------------------------------------------------------------------------------------------------------------------------------------------------------------------------------------------------------------|
| 4RepCT | <i>Euprosthonops australis</i> | <i>E. coli</i>          | <p>GSGNSGIQGGYGGGLQGQGGYQGAGSSAAAAAAAAAAAA [11-36]</p> <p>AGGQGGQGGYQGSGSSAAAAAAAAAAAAAGRGQG</p> <p>GYQGSGGNAAAAAAAAAAAAAGQGQGGYGRQSQGA</p> <p>GSAAAAAAAAAAAAAGSGQGGYGGQGQGGYQSSASASA</p> <p>AASAASTVANSVRLSSPSAVSRVSSAVSSLVSNQVNMAALP</p> <p>NIISNISSVSASAPGASGCEVIVQALLEVITALVQIVSSSSVGYIN</p> <p>PSAVNQITNVVANAMAQVMG (contains C-terminal domain)</p> <p>+ cell adhesion peptides (e.g. RGD, IKVAV)</p> <p>+ antimicrobial peptides (e.g. Lac and Mag)</p> <p>+ specific ligand-interaction peptides (e.g. IgG and albumin)</p> <p>+ entire proteins (e.g. FGF)</p>                                                                                                                                                                                                                                                                                                                                                                                     |
| 2RepCT |                                |                         | <p>GNSGRGQGGYQGSGGNAAAAAAAAAAAAAGQGQGG</p> <p>YGRQSQGAGSAAAAAAAAAAAAAGSQGGYGGQGQGGY [37-41]</p> <p>GQSGNSVTSGGYGYGTSAAAGAGVAAGSYAGAVNRLSSAEAA</p> <p>SRVSSNIAAIASGGASALPSVISNIYSGVVASGVSSNEALIQALLE</p> <p>LLSALVHVLSSASIGNVSSVGVDSTLNVVQDSVGQYVG</p> <p>+ N-terminal domain</p>                                                                                                                                                                                                                                                                                                                                                                                                                                                                                                                                                                                                                                                                            |
| rMaSp1 | <i>Trichonephila clavipes</i>  | <i>Transgenic goats</i> | <p>QGAGAAAAAAGGAGQGGYGGGLGGQGAGQGGYGGGLGGQGA [42-48]</p> <p>GQGAGAAAAAAGGAGQGGYGGGLGSQGAGRGGQGAGAAA</p> <p>AAAGGAGQGGYGGGLGSQGAGRGGGLGGQGAGAAAAAAGG</p> <p>AGQGGYGGGLGNQGAGRGGQGAAAAAAGGAGQGGYGGGLGS</p> <p>QGAGRGGGLGGQGAGAAAAAAGGAGQGGYGGGLGGQGAGQG</p> <p>GYGGLGSQGAGRGGGLGGQGAGAAAAAAGGAGQGGLGGQ</p> <p>GAGQGAGASAAAAAGGAGQGGYGGGLGSQGAGRGGEGAGAA</p> <p>AAAAGGAGQGGYGGGLGGQGAGQGGYGGGLGSQGAGRGGGLG</p> <p>GQGAGAAAAGGAGQGGLGGQGAGQGAGAAAAAAGGAGQ</p> <p>GGYGGGLGSQGAGRGGGLGGQGAGAVAAAAAGGAGQGGYGG</p> <p>LGSQGAGRGGQGAGAAAAAAGGAGQRGYGGGLGNQGAGR</p> <p>GLGGQGAGAAAAAAGGAGQGGYGGGLGNQGAGRGGQGAA</p> <p>AAAGGAGQGGYGGGLGSQGAGRGGQGAGAAAAAAGVAGQE</p> <p>GIRGQGAGQGGYGGGLGSQSGRGGGLGGQGAGAAAAAAGGA</p> <p>GQGGLGGQGAGQGAGAAAAAAGGVRQGGYGGGLGSQGAGR</p> <p>GGQGAGAAAAAAGGAGQGGYGGGLGGQGVGRGGGLGGQGAG</p> <p>AAAAGGAGQGGYGGVGSASASAAASRLSPQASSRLSSAVS</p> <p>NLVATGPTNSAALSSTISNVVSQIGASNPGLSGCDVLIQALLEV</p> <p>VSALIQILGSSSIGQVNYGSAGQATQIVGQSVYQALG</p> |
| rMaSp2 |                                |                         | <p>PGGYGPGQQGPGGYGPGQQGPGSPGSAAAAAAAAAAGPGGY</p> <p>GPGQQGPGGYGPGQQGPGRYGPGQQGPGSPGSAAAAAAGSG</p> <p>QQGPGGYGPRQQGPGGYGQGQQGPGSPGSAAAAAASAES</p> <p>GQQGPGGYGPGQQGPGGYGPGQQGPGGYGPGQQGPGSPGSA</p> <p>AAAAAAASGPGQQGPGGYGPGQQGPGGYGPGQQGPGSPGSA</p> <p>AAAAAAASGPGQQGPGGYGPGQQGPGGYGPGQQGLSGPGSA</p> <p>AAAAAAGPGQQGPGGYGPGQQGPGSPGSAAAAAAAAAAGPG</p>                                                                                                                                                                                                                                                                                                                                                                                                                                                                                                                                                                                                        |

|                                                 |                                         |                |                                                                                                                                                                                                                                                                                                                                                                                                           |         |
|-------------------------------------------------|-----------------------------------------|----------------|-----------------------------------------------------------------------------------------------------------------------------------------------------------------------------------------------------------------------------------------------------------------------------------------------------------------------------------------------------------------------------------------------------------|---------|
|                                                 |                                         |                | GYGPQQQPGGYGPGQQQPSGAGSAAAAAAGPQQQLGG<br>YGPGQQGPGGYGPGQQGPGGYGPGSASAAAAAAGPQQQPGG<br>GYGPQQQPSGPGSASAAAAAAGPGGYGPGQQQPGGYAP<br>GQQGSPGPGSASAAAAAAGPGGYGPGQQGPGGYAPGQQ<br>GPGSPGSAAAAAAGPGGYGPAQQGSPGPIAASASAGP<br>GGYGPAQQGPAGYGPGSAVAASAGAGSAGYGPGSQASAAAS<br>RLASPDGARVASAVSNLVSSGPTSSAALSSVISNAVSIQIGASNP<br>GLSGCDVLIQALLEIVSACVTILSSSSIGQVNYGAASQFAQVVGQ<br>SVLSAF                                  |         |
| FLYS,<br>FLYS <sub>3</sub><br>FLYS <sub>4</sub> | <i>Trichonephila</i><br><i>clavipes</i> | <i>E. coli</i> | Module repeated up to 4 times<br>GPGGPGGYGPGGSGPGGYGPGGSGPGGYGPGGSGPGGYGPGG<br>SGPSGPGSAAAAAAGPGGYGPGGSGPGGYGPGGSGPGGYG<br>PGGSGPGGYGPGGSGPGGYGPGGSGPSGPGSAAAAAAGPG<br>GYGPGGSGPGGYGPGGSGPGGYGPGGSGPSGPGSAAAAA<br>GPGGYGPGGSGPGGYGPGGSGPGGYGPGGSGPGGYGPGGSGP<br>GGYGPGGSGPGGYGPGGSGPSGPGSAAAAAAGPGGYGPG<br>GSGPGGYGPGGSGPGGYGPGGSGPGGYGPGGSGPGGYGPGGS<br>GPGGYGPGGSGPGGYGPGGSGPGGYGPGGSGPSGPGSAAAA<br>AAA | [44,47] |
| 1-mer until<br>192-mer                          | <i>Trichonephila</i><br><i>clavipes</i> | <i>E. coli</i> | 1 mer module repeated up to 96mer<br>SGRGGLGGQGAGAAAAAGGAGQGGYGGLGSQGT<br>+ cell adhesion peptides (e.g. RGD)<br>+ antimicrobial peptides<br>+ biomineralization peptides<br>+ cancer treating peptides                                                                                                                                                                                                   | [49-72] |

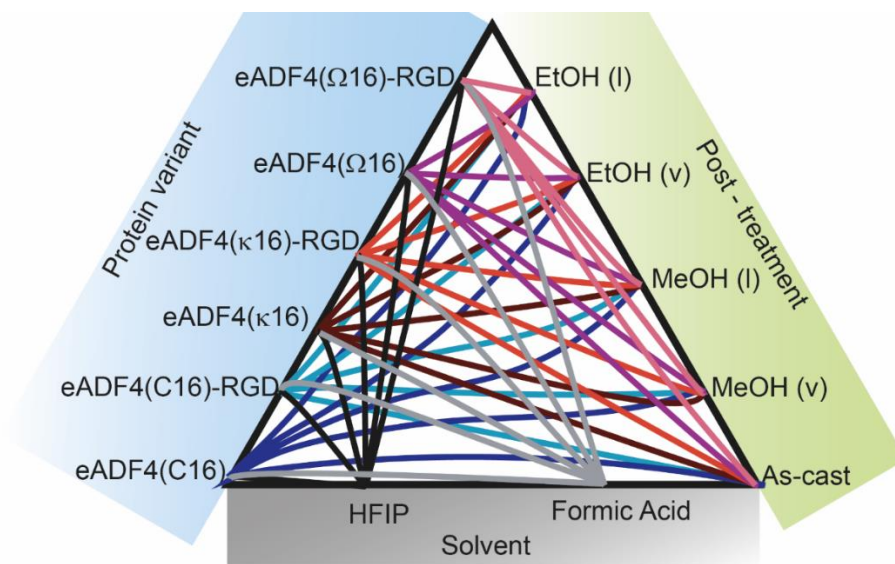

**Figure S1.** Scheme of the sample matrix of experimental settings used to analyze how the spider silk protein sequence, the casting solvent and the post-treatment influence cell adhesion. The recombinant ADF4 variants (eADF4(C16), eADF4( $\kappa$ 16), eADF4( $\Omega$ 16), eADF4(C16)-RGD, eADF4( $\kappa$ 16)-RGD and eADF4( $\Omega$ 16)-RGD) were either solved in FA or HFIP and cast on ozone-pre-treated PS surfaces. Furthermore, coatings were differently post-treated (MeOH vapor or liquid, EtOH vapor or liquid) and compared to non-post-treated films regarding adhesion of human BJ skin fibroblasts and human MG63 bone fibroblasts. The results thereof are summarized in Figure 6, S2 and S3.

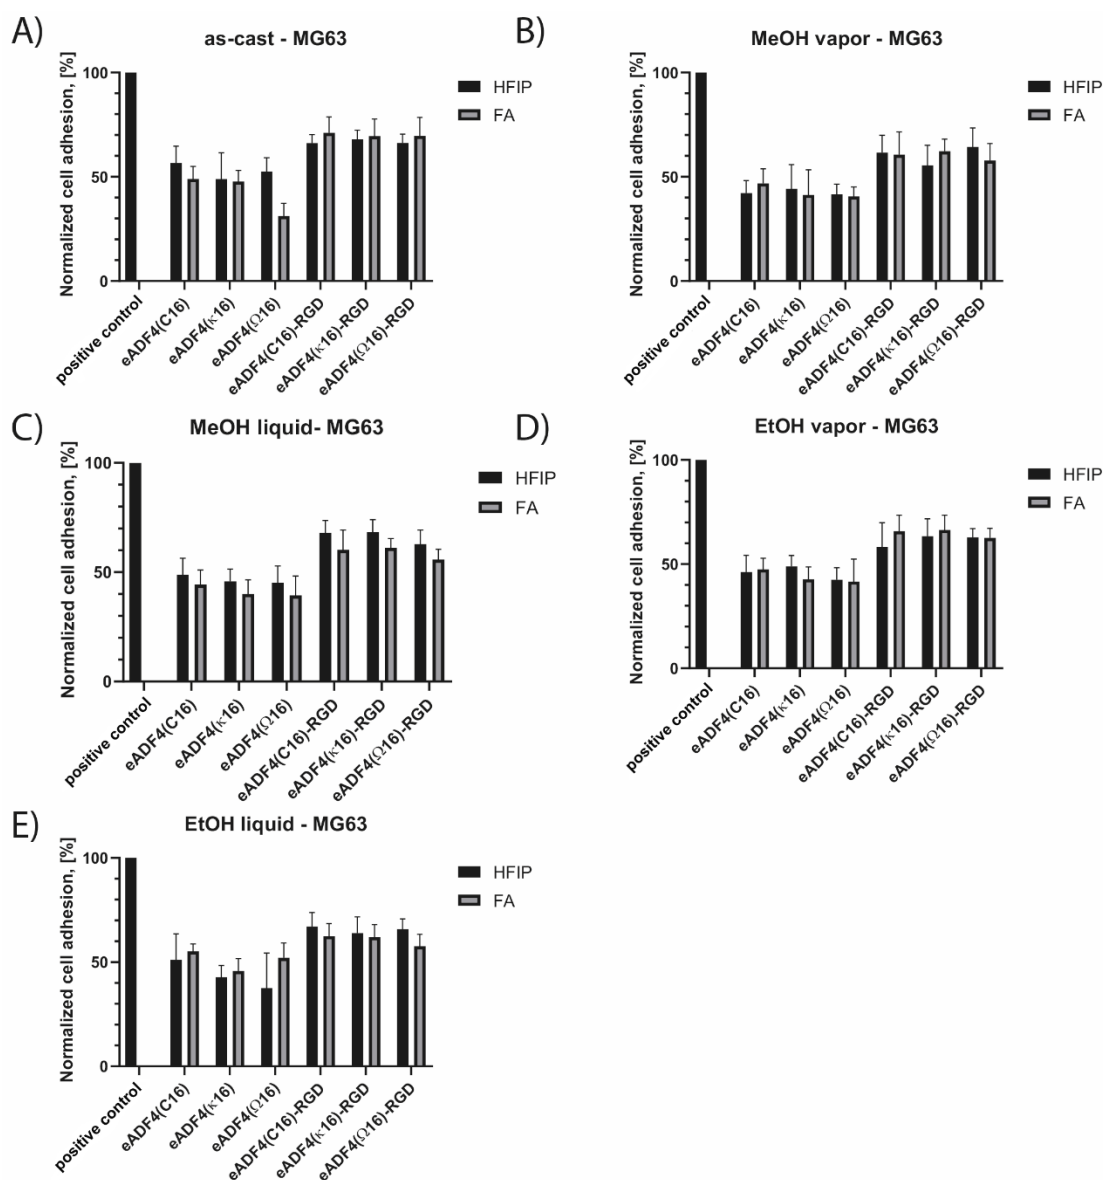

**Figure S2.** Cell adhesion of MG63 on films made of eADF4 variants (A) as cast or post-treated with (B) MeOH vapor, (C) MeOH liquid, (D) EtOH vapor, and (E) EtOH liquid.

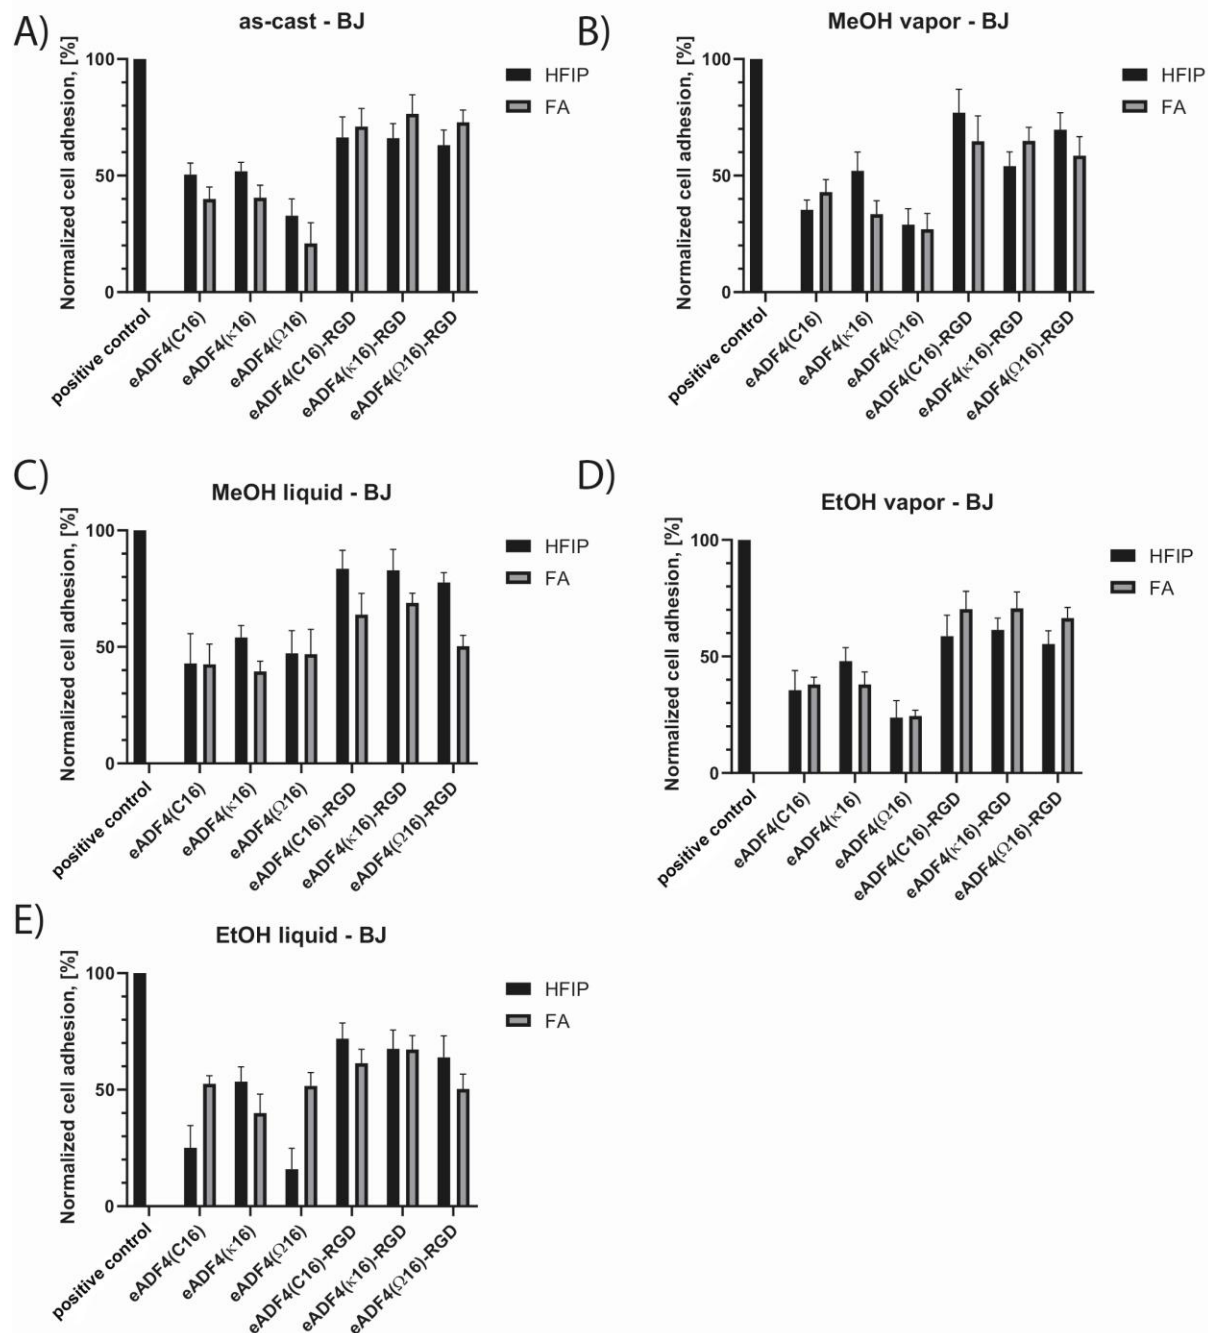

**Figure S3.** Cell adhesion on films made of BJ of eADF4 variants (A) as cast or post-treated with (B) MeOH vapor, (C) MeOH liquid, (D) EtOH vapor, (E) EtOH liquid.

## References

1. Lentz, S.; Trossmann, V.T.; Borkner, C.B.; Beyersdorfer, V.; Rottmar, M.; Scheibel, T. Structure–Property Relationship Based on the Amino Acid Composition of Recombinant Spider Silk Proteins for Potential Biomedical Applications. *ACS Applied Materials & Interfaces* **2022**, *14*, 31751–31766, doi:10.1021/acsami.2c09590.
2. Kumari, S.; Lang, G.; DeSimone, E.; Spengler, C.; Trossmann, V.T.; Lückner, S.; Hudel, M.; Jacobs, K.; Krämer, N.; Scheibel, T. Engineered spider silk-based 2D and 3D materials prevent microbial infestation. *Materials Today* **2020**, *41*, 21–33, doi:<https://doi.org/10.1016/j.mattod.2020.06.009>.
3. Esser, T.U.; Trossmann, V.T.; Lentz, S.; Engel, F.B.; Scheibel, T. Designing of spider silk proteins for human induced pluripotent stem cell-based cardiac tissue engineering. *Materials Today Bio* **2021**, *11*, 100114, doi:<https://doi.org/10.1016/j.mtbio.2021.100114>.
4. Trossmann, V.T.; Scheibel, T. Design of Recombinant Spider Silk Proteins for Cell Type Specific Binding. *Advanced Healthcare Materials* **2023**, *12*, 2202660, doi:<https://doi.org/10.1002/adhm.202202660>.

5. Borkner, C.B.; Wohlrab, S.; Möller, E.; Lang, G.; Scheibel, T. Surface Modification of Polymeric Biomaterials Using Recombinant Spider Silk Proteins. *ACS Biomaterials Science & Engineering* **2017**, *3*, 767-775, doi:10.1021/acsbmaterials.6b00306.
6. Herold, H.M.; Döbl, A.; Wohlrab, S.; Humenik, M.; Scheibel, T. Designed Spider Silk-Based Drug Carrier for Redox- or pH-Triggered Drug Release. *Biomacromolecules* **2020**, *21*, 4904-4912, doi:10.1021/acs.biomac.0c01138.
7. Neubauer, V.J.; Scheibel, T. Spider Silk Fusion Proteins for Controlled Collagen Binding and Biomineralization. *ACS Biomater Sci Eng* **2020**, *6*, 5599-5608, doi:10.1021/acsbmaterials.0c00818.
8. Mohammadi, P.; Aranko, A.S.; Lemetti, L.; Cenev, Z.; Zhou, Q.; Virtanen, S.; Landowski, C.P.; Penttilä, M.; Fischer, W.J.; Wagermaier, W.; et al. Phase transitions as intermediate steps in the formation of molecularly engineered protein fibers. *Communications Biology* **2018**, *1*, 86, doi:10.1038/s42003-018-0090-y.
9. Välsäalmi, T.; Roas-Escalona, N.; Meinander, K.; Mohammadi, P.; Linder, M.B. Highly Hydrophobic Films of Engineered Silk Proteins by a Simple Deposition Method. *Langmuir* **2023**, *39*, 4370-4381, doi:10.1021/acs.langmuir.2c03442.
10. Mohammadi, P.; Aranko, A.S.; Landowski, C.P.; Ikkala, O.; Jaudzems, K.; Wagermaier, W.; Linder, M.B. Biomimetic composites with enhanced toughening using silk-inspired triblock proteins and aligned nanocellulose reinforcements. *Science advances* **2019**, *5*, eaaw2541.
11. Hedhammar, M.; Rising, A.; Grip, S.; Martinez, A.S.; Nordling, K.; Casals, C.; Stark, M.; Johansson, J. Structural Properties of Recombinant Nonrepetitive and Repetitive Parts of Major Ampullate Spidroin 1 from *Euprosthenops australis*: Implications for Fiber Formation. *Biochemistry* **2008**, *47*, 3407-3417, doi:10.1021/bi702432y.
12. Stark, M.; Grip, S.; Rising, A.; Hedhammar, M.; Engström, W.; Hjälm, G.; Johansson, J. Macroscopic Fibers Self-Assembled from Recombinant Miniature Spider Silk Proteins. *Biomacromolecules* **2007**, *8*, 1695-1701, doi:10.1021/bm070049y.
13. Widhe, M.; Shalaly, N.D.; Hedhammar, M. A fibronectin mimetic motif improves integrin mediated cell binding to recombinant spider silk matrices. *Biomaterials* **2016**, *74*, 256-266, doi:<https://doi.org/10.1016/j.biomaterials.2015.10.013>.
14. Widhe, M.; Johansson, U.; Hillerdahl, C.-O.; Hedhammar, M. Recombinant spider silk with cell binding motifs for specific adherence of cells. *Biomaterials* **2013**, *34*, 8223-8234, doi:<https://doi.org/10.1016/j.biomaterials.2013.07.058>.
15. Chouhan, D.; Thatikonda, N.; Nilebäck, L.; Widhe, M.; Hedhammar, M.; Mandal, B.B. Recombinant Spider Silk Functionalized Silkworm Silk Matrices as Potential Bioactive Wound Dressings and Skin Grafts. *ACS Applied Materials & Interfaces* **2018**, *10*, 23560-23572, doi:10.1021/acsami.8b05853.
16. Nilebäck, L.; Hedin, J.; Widhe, M.; Floderus, L.S.; Krona, A.; Bysell, H.; Hedhammar, M. Self-Assembly of Recombinant Silk as a Strategy for Chemical-Free Formation of Bioactive Coatings: A Real-Time Study. *Biomacromolecules* **2017**, *18*, 846-854, doi:10.1021/acs.biomac.6b01721.
17. Jansson, R.; Thatikonda, N.; Lindberg, D.; Rising, A.; Johansson, J.; Nygren, P.-Å.; Hedhammar, M. Recombinant Spider Silk Genetically Functionalized with Affinity Domains. *Biomacromolecules* **2014**, *15*, 1696-1706, doi:10.1021/bm500114e.
18. Thatikonda, N.; Nilebäck, L.; Kempe, A.; Widhe, M.; Hedhammar, M. Bioactivation of Spider Silk with Basic Fibroblast Growth Factor for in Vitro Cell Culture: A Step toward Creation of Artificial ECM. *ACS Biomaterials Science & Engineering* **2018**, *4*, 3384-3396, doi:10.1021/acsbmaterials.8b00844.
19. Jansson, R.; Courtin, C.M.; Sandgren, M.; Hedhammar, M. Rational Design of Spider Silk Materials Genetically Fused with an Enzyme. *Advanced Functional Materials* **2015**, *25*, 5343-5352, doi:<https://doi.org/10.1002/adfm.201501833>.
20. Nilebäck, L.; Chouhan, D.; Jansson, R.; Widhe, M.; Mandal, B.B.; Hedhammar, M. Silk-Silk Interactions between Silkworm Fibroin and Recombinant Spider Silk Fusion Proteins Enable the Construction of Bioactive Materials. *ACS Applied Materials & Interfaces* **2017**, *9*, 31634-31644, doi:10.1021/acsami.7b10874.
21. Nilebäck, L.; Widhe, M.; Seijsing, J.; Bysell, H.; Sharma, P.K.; Hedhammar, M. Bioactive Silk Coatings Reduce the Adhesion of *Staphylococcus aureus* while Supporting Growth of Osteoblast-like Cells. *ACS Applied Materials & Interfaces* **2019**, *11*, 24999-25007, doi:10.1021/acsami.9b05531.
22. Tasiopoulos, C.P.; Petronis, S.; Sahlin, H.; Hedhammar, M. Surface Functionalization of PTFE Membranes Intended for Guided Bone Regeneration Using Recombinant Spider Silk. *ACS Appl Bio Mater* **2020**, *3*, 577-583, doi:10.1021/acsbm.9b00972.
23. Jansson, R.; Lau, C.H.; Ishida, T.; Ramström, M.; Sandgren, M.; Hedhammar, M. Functionalized silk assembled from a recombinant spider silk fusion protein (Z-4RepCT) produced in the methylotrophic yeast *Pichia pastoris*. *Biotechnol J* **2016**, *11*, 687-699, doi:10.1002/biot.201500412.



24. Hedhammar, M.; Bramfeldt, H.; Baris, T.; Widhe, M.; Askarieh, G.; Nordling, K.; von Aulock, S.; Johansson, J. Sterilized Recombinant Spider Silk Fibers of Low Pyrogenicity. *Biomacromolecules* **2010**, *11*, 953-959, doi:10.1021/bm9014039.
25. Gustafsson, L.; Jansson, R.; Hedhammar, M.; van der Wijngaart, W. Structuring of Functional Spider Silk Wires, Coatings, and Sheets by Self-Assembly on Superhydrophobic Pillar Surfaces. *Adv Mater* **2018**, *30*, doi:10.1002/adma.201704325.
26. Nilebäck, L.; Arola, S.; Kvik, M.; Paananen, A.; Linder, M.B.; Hedhammar, M. Interfacial Behavior of Recombinant Spider Silk Protein Parts Reveals Cues on the Silk Assembly Mechanism. *Langmuir* **2018**, *34*, 11795-11805, doi:10.1021/acs.langmuir.8b02381.
27. Chouhan, D.; Lohe, T.-u.; Thatikonda, N.; Naidu, V.G.M.; Hedhammar, M.; Mandal, B.B. Silkworm Silk Scaffolds Functionalized with Recombinant Spider Silk Containing a Fibronectin Motif Promotes Healing of Full-Thickness Burn Wounds. *ACS Biomaterials Science & Engineering* **2019**, *5*, 4634-4645, doi:10.1021/acsbmaterials.9b00887.
28. Widhe, M.; Bysell, H.; Nystedt, S.; Schenning, I.; Malmsten, M.; Johansson, J.; Rising, A.; Hedhammar, M. Recombinant spider silk as matrices for cell culture. *Biomaterials* **2010**, *31*, 9575-9585, doi:<https://doi.org/10.1016/j.biomaterials.2010.08.061>.
29. Gustafsson, L.; Tasiopoulos, C.P.; Jansson, R.; Kvik, M.; Duursma, T.; Gasser, T.C.; van der Wijngaart, W.; Hedhammar, M. Recombinant Spider Silk Forms Tough and Elastic Nanomembranes that are Protein-Permeable and Support Cell Attachment and Growth. *Advanced Functional Materials* **2020**, *30*, 2002982, doi:<https://doi.org/10.1002/adfm.202002982>.
30. Lewicka, M.; Hermanson, O.; Rising, A.U. Recombinant spider silk matrices for neural stem cell cultures. *Biomaterials* **2012**, *33*, 7712-7717, doi:<https://doi.org/10.1016/j.biomaterials.2012.07.021>.
31. Fredriksson, C.; Hedhammar, M.; Feinstein, R.; Nordling, K.; Kratz, G.; Johansson, J.; Huss, F.; Rising, A. Tissue response to subcutaneously implanted recombinant spider silk: an in vivo study. *Materials* **2009**, *2*, 1908-1922.
32. Lewicka, M.; Rebellato, P.; Lewicki, J.; Uhlén, P.; Rising, A.; Hermanson, O. Recombinant Spider Silk Protein Matrices Facilitate Differentiation of Neural Stem Cells Into Mature and Functional Neurons. *Frontiers in Materials* **2021**, *7*, doi:10.3389/fmats.2020.560372.
33. Johansson, U.; Ria, M.; Åvall, K.; Dekki Shalaly, N.; Zaitsev, S.V.; Berggren, P.-O.; Hedhammar, M. Pancreatic Islet Survival and Engraftment Is Promoted by Culture on Functionalized Spider Silk Matrices. *PLOS ONE* **2015**, *10*, e0130169, doi:10.1371/journal.pone.0130169.
34. Shalaly, N.D.; Ria, M.; Johansson, U.; Åvall, K.; Berggren, P.-O.; Hedhammar, M. Silk matrices promote formation of insulin-secreting islet-like clusters. *Biomaterials* **2016**, *90*, 50-61, doi:<https://doi.org/10.1016/j.biomaterials.2016.03.006>.
35. Thatikonda, N.; Delfani, P.; Jansson, R.; Petersson, L.; Lindberg, D.; Wingren, C.; Hedhammar, M. Genetic fusion of single-chain variable fragments to partial spider silk improves target detection in micro- and nanoarrays. *Biotechnology Journal* **2016**, *11*, 437-448, doi:<https://doi.org/10.1002/biot.201500297>.
36. Grip, S.; Johansson, J.; Hedhammar, M. Engineered disulfides improve mechanical properties of recombinant spider silk. *Protein Sci* **2009**, *18*, 1012-1022, doi:10.1002/pro.111.
37. Leppert, A.; Chen, G.; Lama, D.; Sahin, C.; Railaite, V.; Shilkova, O.; Arndt, T.; Marklund, E.G.; Lane, D.P.; Rising, A.; et al. Liquid-Liquid Phase Separation Primes Spider Silk Proteins for Fiber Formation via a Conditional Sticker Domain. *Nano Letters* **2023**, *23*, 5836-5841, doi:10.1021/acs.nanolett.3c00773.
38. Andersson, M.; Jia, Q.; Abella, A.; Lee, X.-Y.; Landreh, M.; Purhonen, P.; Hebert, H.; Tenje, M.; Robinson, C.V.; Meng, Q.; et al. Biomimetic spinning of artificial spider silk from a chimeric minispidroin. *Nature Chemical Biology* **2017**, *13*, 262-264, doi:10.1038/nchembio.2269.
39. Arndt, T.; Greco, G.; Schmuck, B.; Bunz, J.; Shilkova, O.; Francis, J.; Pugno, N.M.; Jaudzems, K.; Barth, A.; Johansson, J.; et al. Engineered Spider Silk Proteins for Biomimetic Spinning of Fibers with Toughness Equal to Dragline Silks. *Advanced Functional Materials* **2022**, *32*, 2200986, doi:<https://doi.org/10.1002/adfm.202200986>.
40. Schmuck, B.; Greco, G.; Bäcklund, F.G.; Pugno, N.M.; Johansson, J.; Rising, A. Impact of physio-chemical spinning conditions on the mechanical properties of biomimetic spider silk fibers. *Communications Materials* **2022**, *3*, 83, doi:10.1038/s43246-022-00307-6.
41. Liu, F.Y.C. Silk-based antimicrobial peptide mixed with recombinant spidroin creates functionalized spider silk. *bioRxiv* **2021**, 2021.2003.2026.437269, doi:10.1101/2021.03.26.437269.
42. Jones, J.A.; Harris, T.I.; Bell, B.E.; Oliveira, P.F. Material Formation of Recombinant Spider Silks through Aqueous Solvation using Heat and Pressure. *J Vis Exp* **2019**, doi:10.3791/59318.
43. Jones, J.A.; Harris, T.I.; Tucker, C.L.; Berg, K.R.; Christy, S.Y.; Day, B.A.; Gaztambide, D.A.; Needham, N.J.C.; Ruben, A.L.; Oliveira, P.F.; et al. More Than Just Fibers: An Aqueous Method for the Production of Innovative

- Recombinant Spider Silk Protein Materials. *Biomacromolecules* **2015**, *16*, 1418-1425, doi:<https://doi.org/10.1021/acs.biomac.5b00226>.
44. Harris, T.I.; Gaztambide, D.A.; Day, B.A.; Brock, C.L.; Ruben, A.L.; Jones, J.A.; Lewis, R.V. Sticky Situation: An Investigation of Robust Aqueous-Based Recombinant Spider Silk Protein Coatings and Adhesives. *Biomacromolecules* **2016**, *17*, 3761-3772, doi:10.1021/acs.biomac.6b01267.
  45. Tucker, C.L.; Jones, J.A.; Bringham, H.N.; Copeland, C.G.; Addison, J.B.; Weber, W.S.; Mou, Q.; Yarger, J.L.; Lewis, R.V. Mechanical and Physical Properties of Recombinant Spider Silk Films Using Organic and Aqueous Solvents. *Biomacromolecules* **2014**, *15*, 3158-3170, doi:10.1021/bm5007823.
  46. An, B.; Tang-Schomer, M.; Huang, W.; He, J.; Jones, J.; Lewis, R.V.; Kaplan, D.L. Physical and biological regulation of neuron regenerative growth and network formation on recombinant dragline silks. *Biomaterials* **2015**, *48*, 137-146, doi:10.1016/j.biomaterials.2015.01.044.
  47. Bhattacharyya, G.; Oliveira, P.; Krishnaji, S.T.; Chen, D.; Hinman, M.; Bell, B.; Harris, T.I.; Ghazitabatabaei, A.; Lewis, R.V.; Jones, J.A. Large scale production of synthetic spider silk proteins in Escherichia coli. *Protein Expression and Purification* **2021**, *183*, 105839, doi:<https://doi.org/10.1016/j.pep.2021.105839>.
  48. Decker, R.E.; Harris, T.I.; Memmott, D.R.; Peterson, C.J.; Lewis, R.V.; Jones, J.A. Method for the Destruction of Endotoxin in Synthetic Spider Silk Proteins. *Sci Rep* **2018**, *8*, 12166, doi:10.1038/s41598-018-29719-6.
  49. Franco, A.R.; Fernandes, E.M.; Rodrigues, M.T.; Rodrigues, F.J.; Gomes, M.E.; Leonor, I.B.; Kaplan, D.L.; Reis, R.L. Antimicrobial coating of spider silk to prevent bacterial attachment on silk surgical sutures. *Acta Biomaterialia* **2019**, *99*, 236-246, doi:<https://doi.org/10.1016/j.actbio.2019.09.004>.
  50. Franco, A.R.; Palma Kimmerling, E.; Silva, C.; Rodrigues, F.J.; Leonor, I.B.; Reis, R.L.; Kaplan, D.L. Silk-Based Antimicrobial Polymers as a New Platform to Design Drug-Free Materials to Impede Microbial Infections. *Macromolecular Bioscience* **2018**, *18*, 1800262, doi:<https://doi.org/10.1002/mabi.201800262>.
  51. Gomes, S.; Gallego - Llamas, J.; Leonor, I.B.; Mano, J.F.; Reis, R.L.; Kaplan, D.L. Biological responses to spider silk - antibiotic fusion protein. *Journal of tissue engineering and regenerative medicine* **2012**, *6*, 356-368.
  52. Bini, E.; Foo, C.W.P.; Huang, J.; Karageorgiou, V.; Kitchel, B.; Kaplan, D.L. RGD-Functionalized Bioengineered Spider Dragline Silk Biomaterial. *Biomacromolecules* **2006**, *7*, 3139-3145, doi:10.1021/bm0607877.
  53. Xia, X.X.; Qian, Z.G.; Ki, C.S.; Park, Y.H.; Kaplan, D.L.; Lee, S.Y. Native-sized recombinant spider silk protein produced in metabolically engineered Escherichia coli results in a strong fiber. *Proc Natl Acad Sci U S A* **2010**, *107*, 14059-14063, doi:10.1073/pnas.1003366107.
  54. Peng, X.; Cui, Y.; Chen, J.; Gao, C.; Yang, Y.; Yu, W.; Rai, K.; Zhang, M.; Nian, R.; Bao, Z.; et al. High-Strength Collagen-Based Composite Films Regulated by Water-Soluble Recombinant Spider Silk Proteins and Water Annealing. *ACS Biomaterials Science & Engineering* **2022**, *8*, 3341-3353, doi:10.1021/acsbomaterials.2c00416.
  55. Peng, Q.; Zhang, Y.; Lu, L.; Shao, H.; Qin, K.; Hu, X.; Xia, X. Recombinant spider silk from aqueous solutions via a bio-inspired microfluidic chip. *Sci Rep* **2016**, *6*, 36473, doi:10.1038/srep36473.
  56. Rabotyagova, O.S.; Cebe, P.; Kaplan, D.L. Self-Assembly of Genetically Engineered Spider Silk Block Copolymers. *Biomacromolecules* **2009**, *10*, 229-236, doi:10.1021/bm800930x.
  57. Numata, K.; Mieszawska-Czajkowska, A.J.; Kvenvold, L.A.; Kaplan, D.L. Silk-Based Nanocomplexes with Tumor-Homing Peptides for Tumor-Specific Gene Delivery. *Macromolecular Bioscience* **2012**, *12*, 75-82, doi:<https://doi.org/10.1002/mabi.201100274>.
  58. Numata, K.; Reagan, M.R.; Goldstein, R.H.; Rosenblatt, M.; Kaplan, D.L. Spider Silk-Based Gene Carriers for Tumor Cell-Specific Delivery. *Bioconjugate Chemistry* **2011**, *22*, 1605-1610, doi:10.1021/bc200170u.
  59. Bowen, C.H.; Dai, B.; Sargent, C.J.; Bai, W.; Ladiwala, P.; Feng, H.; Huang, W.; Kaplan, D.L.; Galazka, J.M.; Zhang, F. Recombinant Spidroins Fully Replicate Primary Mechanical Properties of Natural Spider Silk. *Biomacromolecules* **2018**, *19*, 3853-3860, doi:<https://doi.org/10.1021/acs.biomac.8b00980>.
  60. Dinjaski, N.; Plowright, R.; Zhou, S.; Belton, D.J.; Perry, C.C.; Kaplan, D.L. Osteoinductive recombinant silk fusion proteins for bone regeneration. *Acta Biomater* **2017**, *49*, 127-139, doi:10.1016/j.actbio.2016.12.002.
  61. Wong Po Foo, C.; Patwardhan, S.V.; Belton, D.J.; Kitchel, B.; Anastasiades, D.; Huang, J.; Naik, R.R.; Perry, C.C.; Kaplan, D.L. Novel nanocomposites from spider silk-silica fusion (chimeric) proteins. *Proceedings of the National Academy of Sciences* **2006**, *103*, 9428-9433, doi:10.1073/pnas.0601096103.
  62. Huang, J.; Wong, C.; George, A.; Kaplan, D.L. The effect of genetically engineered spider silk-dentin matrix protein 1 chimeric protein on hydroxyapatite nucleation. *Biomaterials* **2007**, *28*, 2358-2367, doi:<https://doi.org/10.1016/j.biomaterials.2006.11.021>.
  63. Meirovitch, S.; Shtein, Z.; Ben-Shalom, T.; Lapidot, S.; Tamburu, C.; Hu, X.; Kluge, J.; Raviv, U.; Kaplan, D.; Shoseyov, O. Spider Silk-CBD-Cellulose Nanocrystal Composites: Mechanism of Assembly. *International journal of molecular sciences* **2016**, *17*, doi:10.3390/ijms17091573.
  64. Gomes, S.C.; Leonor, I.B.; Mano, J.F.; Reis, R.L.; Kaplan, D.L. Antimicrobial functionalized genetically engineered spider silk. *Biomaterials* **2011**, *32*, 4255-4266, doi:<https://doi.org/10.1016/j.biomaterials.2011.02.040>.



65. Gomes, S.; Gallego-Llamas, J.; Leonor, I.B.; Mano, J.F.; Reis, R.L.; Kaplan, D.L. In Vivo Biological Responses to Silk Proteins Functionalized with Bone Sialoprotein. *Macromolecular Bioscience* **2013**, *13*, 444-454, doi:<https://doi.org/10.1002/mabi.201200372>.
66. Gomes, S.; Leonor, I.B.; Mano, J.F.; Reis, R.L.; Kaplan, D.L. Spider silk-bone sialoprotein fusion proteins for bone tissue engineering. *Soft Matter* **2011**, *7*, 4964-4973, doi:10.1039/C1SM05024A.
67. Numata, K.; Kaplan, D.L. Silk-Based Gene Carriers with Cell Membrane Destabilizing Peptides. *Biomacromolecules* **2010**, *11*, 3189-3195, doi:10.1021/bm101055m.
68. Plowright, R.; Dinjaski, N.; Zhou, S.; Belton, D.J.; Kaplan, D.L.; Perry, C.C. Influence of silk-silica fusion protein design on silica condensation in vitro and cellular calcification. *RSC Advances* **2016**, *6*, 21776-21788, doi:10.1039/C6RA03706B.
69. Belton, D.J.; Mieszawska, A.J.; Currie, H.A.; Kaplan, D.L.; Perry, C.C. Silk-silica composites from genetically engineered chimeric proteins: materials properties correlate with silica condensation rate and colloidal stability of the proteins in aqueous solution. *Langmuir* **2012**, *28*, 4373-4381, doi:10.1021/la205084z.
70. Zhou, S.; Huang, W.; Belton, D.J.; Simmons, L.O.; Perry, C.C.; Wang, X.; Kaplan, D.L. Control of silicification by genetically engineered fusion proteins: silk-silica binding peptides. *Acta Biomater* **2015**, *15*, 173-180, doi:10.1016/j.actbio.2014.10.040.
71. Numata, K.; Subramanian, B.; Currie, H.A.; Kaplan, D.L. Bioengineered silk protein-based gene delivery systems. *Biomaterials* **2009**, *30*, 5775-5784, doi:10.1016/j.biomaterials.2009.06.028.
72. Mieszawska, A.J.; Nadkarni, L.D.; Perry, C.C.; Kaplan, D.L. Nanoscale control of silica particle formation via silk-silica fusion proteins for bone regeneration. *Chem Mater* **2010**, *22*, 5780-5785, doi:10.1021/cm101940u.
